# Supplementary material
Source: PubMed Central journal article supplement (PMC7834167)
Supplement: mmc1.pdf [file mmc1.pdf]

# THE LANCET Infectious Diseases

## Supplementary webappendix

Supplement to: Jing Q-L, Liu M-J, Zhang Z-B, et al. Household secondary attack rate of COVID-19 and associated determinants in Guangzhou, China: a retrospective cohort. *Lancet Infect Dis* 2020; published online June 17. [https://doi.org/10.1016/S1473-3099\(20\)30471-0](https://doi.org/10.1016/S1473-3099(20)30471-0).

This translation in Chinese was submitted by the authors and we reproduce it as supplied. It has not been peer reviewed. *The Lancet's* editorial processes have only been applied to the original in English, which should serve as reference for this manuscript.

此简体中文译文由作者提交，我方按照提供的版本刊登。此译文并未经过同行审阅。医学期刊《柳叶刀》的编辑流程仅适用于英文原稿，英文原稿应作为此手稿的参考。

## 摘要

**背景：**截至 2020 年 6 月 8 日，全球报告的 COVID-19 累计病例数已超 7 百万，死亡病例多达 40 万。然而人们对引起该疾病的病毒 SARS-CoV-2 在家庭中的传播效率所知甚少。我们建立一个统计传播模型来估计 SARS-CoV-2 在中国广州的家庭和非家庭密切接触者中的二代传播率。

**方法：**在这一回顾性人群研究中，我们将统计传播模型与广州疾病预防控制中心收集的密切接触追踪数据结合来估计 COVID-19 在家庭和非家庭密切接触者中的二代传播率（定义为一个被感染者将疾病传播给一个易感者的概率）。我们考虑两种不同的关于家庭的定义：具有较近亲缘关系的人构成的群体（比如父母或岳父母），无论是否住在一起；或者居住在同一地址的人构成的群体，无论是否亲属关系。我们分析了人口学特征对传播率的影响以及病例在潜伏期所具有的传播率。

**发现：**在 2020 年 1 月 27 日至 2 月 18 日这一期间，我们追踪调查了 195 个密切接触群体（包括 215 个指示病例，134 个二代或三代病例）和 1964 个未感染密切接触者）。基于平均 5 天潜伏期和最长 13 天传染期的假设，如果没有病例隔离措施，亲属关系对应的家庭内的二代传播率为 12.4%（95% CI 9.8-15.4%），而同住关系对应的二代传播率为 17.1%（95% CI 13.3-21.8%）。二十岁以下的年龄组（odds ratio [OR] 0.23 [95% CI 0.11 - 0.46]）和 20-59 岁的年龄组（OR 0.64 [95% CI 0.43 - 0.97]）的家庭内感染风险均低于 60 岁及以上年龄组。我们发现相对于症状期，潜伏期的传播率可能更高，但是结果不具备统计显著性（OR 0.61 [95% CI 0.27 - 1.38]）。基于指示病例的平均密切接触频率，我们估计广州的局部再生数（R）为 0.5（95% CI 0.41 - 0.62）。如果没有将病例和密切接触者隔离，在家庭定义为亲属关系的前提下，我们预计局部再生数可达 0.6（95% CI 0.49 - 0.74）。

**结论：**SARS-CoV-2 的家庭传播率高于 SARS-CoV 和中东呼吸综合征冠状病毒（Middle East respiratory syndrome coronavirus）。六十岁及以上人群在家庭传播中感染风险最高。除了对病例及时进行筛查和隔离，应对密切接触者及时进行追踪和隔离以防止病毒在潜伏期的继续传播。
